# Supplementary material for: Bi-enzyme assay coupled with silver nanoplate transformation for insecticide detection
Source: Royal Society of Chemistry journal article supplement (doi:10.1039/d4na00585f), 2024-01-01
Supplement: d4na00585f1.pdf [file d4na00585f1.pdf]

## Bi-Enzyme Assay Coupled with Silver Nanoplate Transformation for Insecticide Detection

Thitikan Khampieng,<sup>a</sup> Kaneenard Kewcharoen,<sup>a</sup> Tewarak Parnklang,<sup>b</sup> Sumana Kladsomboon,<sup>c</sup> Orawon Chailapakul<sup>d</sup> and Amara Apilux<sup>\*a</sup>

<sup>a</sup>. Department of Clinical Chemistry, Faculty of Medical Technology, Mahidol University, Thailand.

<sup>b</sup>. Department of Industrial Chemistry, Faculty of Applied Science, King Mongkut's University of Technology North Bangkok, Bangkok 10800, Thailand.

<sup>c</sup>. Department of Radiological Technology, Faculty of Medical Technology, Mahidol University, Thailand.

<sup>d</sup>. Electrochemistry and Optical Spectroscopy Center of Excellence, Department of Chemistry, Faculty of Science, Chulalongkorn University, Bangkok 10330, Thailand.

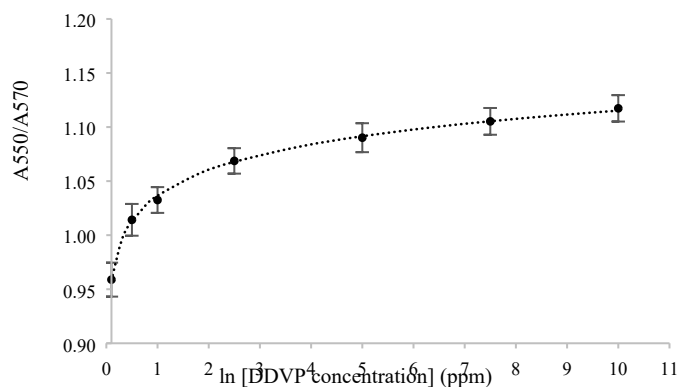

Figure S1. The logarithmic scale of DDVP standard curve.
